# Supplementary material
Source: PubMed Central journal article supplement (PMC7790106)
Supplement: tpmd200002.SD1.pdf [file tpmd200002.SD1.pdf]

## Supplement A

**Supplemental Table 1: Associations between height-for-age, weight-for-age and weight-for-height Z-score categories and prevalent and incident malaria parasitemia outcomes in the following month, complete case analysis**  
**Asembo Bay Cohort Study Nyanza Province, Kenya, 1992 – 1996, Children ages 0-30 months**

| Exposure                                             | Prevalent Parasitemia              |                                   | Incident Parasitemia               |                                   |
|------------------------------------------------------|------------------------------------|-----------------------------------|------------------------------------|-----------------------------------|
|                                                      | Afebrile<br>Odds Ratio<br>(95% CL) | Febrile<br>Odds Ratio<br>(95% CL) | Afebrile<br>Odds Ratio<br>(95% CL) | Febrile<br>Odds Ratio<br>(95% CL) |
| <b>Height-for-Age Z-score</b>                        |                                    |                                   |                                    |                                   |
| Severe<br>( $\leq -3$ )                              | 1.39 (1.05, 1.85)                  | 0.89 (0.66, 1.20)                 | 1.13 (0.73, 1.74)                  | 0.86 (0.51, 1.45)                 |
| Moderate<br>( $> -3$ and $\leq -2$ )                 | 1.36 (1.05, 1.76)                  | 1.01 (0.78, 1.31)                 | 1.29 (0.90, 1.85)                  | 1.34 (0.89, 1.20)                 |
| Mild<br>( $> -2$ and $< 0$ )                         | 1.14 (0.92, 1.41)                  | 0.86 (0.70, 1.06)                 | 1.00 (0.74, 1.36)                  | 0.90 (0.64, 1.26)                 |
| Not stunted - Referent<br>( $\geq 0$ )               | 1                                  | 1                                 | 1                                  | 1                                 |
| <b>Weight-for-Age Z-score</b>                        |                                    |                                   |                                    |                                   |
| Moderate<br>( $> -3$ and $\leq -2$ )                 | 1.27 (0.99, 1.64)                  | 1.05 (0.80, 1.38)                 | 1.39 (0.94, 2.05)                  | 0.95 (0.61, 1.49)                 |
| Mild<br>( $> -2$ and $< 0$ )                         | 1.21 (1.03, 1.42)                  | 1.03 (0.87, 1.23)                 | 1.22 (0.94, 1.57)                  | 1.01 (0.77, 1.33)                 |
| Not Underweight - Referent<br>( $\geq 0$ and $< 1$ ) | 1                                  | 1                                 | 1                                  | 1                                 |
| Mild Overweight<br>( $\geq 1$ )                      | 0.97 (0.76, 1.22)                  | 0.87 (0.69, 1.10)                 | 1.21 (0.85, 1.72)                  | 0.94 (0.66, 1.35)                 |
| <b>Weight-for-Height Z-score</b>                     |                                    |                                   |                                    |                                   |
| Moderate<br>( $> -3$ and $\leq -2$ )                 | 0.96 (0.70, 1.31)                  | 0.91 (0.64, 1.29)                 | 0.86 (0.50, 1.47)                  | 0.70 (0.36, 1.35)                 |
| Mild<br>( $> -2$ and $< 0$ )                         | 0.95 (0.81, 1.10)                  | 0.99 (0.84, 1.17)                 | 1.01 (0.79, 1.29)                  | 0.92 (0.70, 1.21)                 |
| Not Wasted - Referent<br>( $\geq 0$ and $< 2$ )      | 1                                  | 1                                 | 1                                  | 1                                 |
| Overweight<br>( $\geq 2$ )                           | 0.89 (0.73, 1.08)                  | 0.80 (0.66, 0.98)                 | 0.91 (0.69, 1.19)                  | 0.91 (0.68, 1.23)                 |

Odds ratios are from original data with observed outcomes analyzed with weighted GEE models. N = 1,118 for prevalence models. Incidence models were limited to observations with a negative malaria parasite film in the month before the outcome. N = 994.

## Supplement A

**Supplemental Table 2: Associations between height-for-age, weight-for-age and weight-for-height Z-score categories and prevalent and incident malaria parasitemia outcomes in the following month, weighted analysis**

**Asembo Bay Cohort Study Nyanza Province, Kenya, 1992 – 1996, Children ages 0-30 months**

| Exposure                                             | Prevalent Parasitemia              |                                   | Incident Parasitemia               |                                   |
|------------------------------------------------------|------------------------------------|-----------------------------------|------------------------------------|-----------------------------------|
|                                                      | Afebrile<br>Odds Ratio<br>(95% CL) | Febrile<br>Odds Ratio<br>(95% CL) | Afebrile<br>Odds Ratio<br>(95% CL) | Febrile<br>Odds Ratio<br>(95% CL) |
| <b>Height-for-Age Z-score</b>                        |                                    |                                   |                                    |                                   |
| Severe<br>( $\leq -3$ )                              | 1.35 (1.03, 1.76)                  | 0.89 (0.69, 1.14)                 | 1.31 (0.93, 1.85)                  | 0.92 (0.62, 1.35)                 |
| Moderate<br>( $> -3$ and $\leq -2$ )                 | 1.20 (0.95, 1.53)                  | 0.94 (0.76, 1.17)                 | 1.28 (0.95, 1.74)                  | 1.17 (0.85, 1.62)                 |
| Mild<br>( $> -2$ and $< 0$ )                         | 1.07 (0.89, 1.29)                  | 0.90 (0.76, 1.06)                 | 1.09 (0.86, 1.38)                  | 0.94 (0.73, 1.22)                 |
| Not stunted - Referent<br>( $\geq 0$ )               | 1                                  | 1                                 | 1                                  | 1                                 |
| <b>Weight-for-Age Z-score</b>                        |                                    |                                   |                                    |                                   |
| Moderate<br>( $> -3$ and $\leq -2$ )                 | 1.35 (1.09, 1.66)                  | 1.03 (0.84, 1.28)                 | 1.43 (1.05, 1.94)                  | 1.04 (0.74, 1.46)                 |
| Mild<br>( $> -2$ and $< 0$ )                         | 1.16 (1.02, 1.33)                  | 1.04 (0.91, 1.19)                 | 1.20 (0.98, 1.46)                  | 1.02 (0.83, 1.25)                 |
| Not Underweight - Referent<br>( $\geq 0$ and $< 1$ ) | 1                                  | 1                                 | 1                                  | 1                                 |
| Mild Overweight<br>( $\geq 1$ )                      | 1.00 (0.81, 1.22)                  | 0.88 (0.72, 1.08)                 | 1.14 (0.87, 1.50)                  | 0.90 (0.68, 1.20)                 |
| <b>Weight-for-Height Z-score</b>                     |                                    |                                   |                                    |                                   |
| Moderate<br>( $> -3$ and $\leq -2$ )                 | 1.06 (0.82, 1.38)                  | 0.98 (0.74, 1.30)                 | 0.98 (0.65, 1.48)                  | 1.08 (0.68, 1.71)                 |
| Mild<br>( $> -2$ and $< 0$ )                         | 0.98 (0.86, 1.12)                  | 0.98 (0.85, 1.12)                 | 1.02 (0.84, 1.24)                  | 0.95 (0.76, 1.19)                 |
| Not Wasted - Referent<br>( $\geq 0$ and $< 2$ )      | 1                                  | 1                                 | 1                                  | 1                                 |
| Overweight<br>( $\geq 2$ )                           | 0.92 (0.79, 1.07)                  | 0.86 (0.73, 1.01)                 | 0.97 (0.79, 1.20)                  | 0.95 (0.76, 1.20)                 |

Odds ratios are from multiply imputed data with observed outcomes analyzed with weighted GEE models.

Prevalence models are shown in column 1, N = 1,119. Incidence models were limited to observations with a negative malaria parasite film in the month before the outcome. N = 995.
